37

## 38 INTRODUCTION

39 Eosinophils have traditionally been described as effector inflammatory cells that are  
40 protective against parasitic infections but detrimental in allergic disease <sup>1,2</sup>. New evidence has  
41 considerably broadened this paradigm as eosinophils have now been shown to play complex  
42 roles in mucosal immunity and tissue remodelling <sup>3-8</sup>. For example, intestinal eosinophils and  
43 eosinophil peroxidase (EPO) are critical for the initiation of Th2 responses (IgE) to food  
44 allergens in the gastrointestinal (GI) tract <sup>6,9</sup>. Conversely, intestinal eosinophils secrete large  
45 quantities of IL-1 receptor antagonist, thus reducing inflammation in inflammatory bowel disease  
46 (IBD) <sup>10,11</sup>. Eosinophils have also been proposed to play a role in homeostatic tissue remodeling  
47 as their presence is increased at tissues with a high turnover such as the intestine and the uterus  
48 <sup>4,12</sup>. Eosinophils are equipped with damage-sensing receptors which stimulate them to produce  
49 factors involved in tissue repair (*eg.* TGF- $\alpha$  and - $\beta$ , and fibroblast-, platelet- and vascular-  
50 endothelial growth factors, *etc.*) <sup>13</sup>. Hence, deciphering the factors that regulate eosinophils in the  
51 GI mucosa is relevant to understand the role of these cells in health and disease.

52 There is growing evidence on the role of the microbiota in regulating immune responses  
53 and maintaining intestinal homeostasis <sup>14,15</sup>. Studies in germ-free (GF) mice have demonstrated  
54 that the microbiota is crucial for the maturation of the adaptive immune system in the small  
55 intestine (SI) <sup>16</sup>. For example, GF mice have fewer CD4 T cells, intraepithelial lymphocytes, and  
56 lower IgA-producing plasma cells in the lamina propria (LP) of the SI as compared to specific  
57 pathogen free (SPF) mice <sup>14,15,17,18</sup>. Yet, knowledge on the effect of the microbiota on innate cells  
58 that are indigenous to the intestinal tract, such is eosinophils, is scarce <sup>11,19</sup>.

59 Here we examined the impact of the microbiota on eosinophil frequency and function in  
60 the SI. We found that eosinophil frequency was enriched along the SI of GF mice relative to SPF  
61 controls. This was associated with the overexpression of signals involved in the attraction,  
62 retention and survival of eosinophils. This relative hypereosinophilia was also observed in other  
63 mucosal sites, but not in sterile tissues, and was corrected by repletion of microbiota through co-  
64 habitation with altered Schaedler flora (ASF)- or SPF-mice. In addition, we generated a novel  
65 strain of eosinophil-deficient ( $\Delta$ dblGATA1) mice on a GF background. In this system, the  
66 absence of eosinophils was associated with increased collagen accumulation in the submucosa as  
67 well as reduced allergic sensitization. This study illustrates a novel role for the microbiota in  
68 regulating mucosal eosinophils and tissue homeostasis.

69

## 70 MATERIAL AND METHODS

71 **Mice and colonization procedures.** Age-, vendor-, and strain-matched controls were used in all  
72 the experiments. C57BL/6 and BALB/c mice were obtained from Charles River.  $\Delta$ dblGATA1  
73 (GATA) mice were bred in house. A novel strain of GF GATA mice was generated by two-cell  
74 embryo transfer, as previously described <sup>20</sup>. Mice were bred and maintained in flexible film  
75 isolators in McMaster's Axenic Gnotobiotic Unit. GF status was monitored weekly by DNA  
76 immunofluorescence (SYTOX Green), as well as anaerobic and aerobic culture of cecal stool

77 samples. Mice had unlimited access to autoclaved food and water. ASF-colonized mice were  
78 originally generated by co-housing female colonizers harbouring ASF, with GF mice. ASF-  
79 colonized mice were then bred for 3 generations in individually ventilated racks within the  
80 Axenic Gnotobiotic Unit <sup>21</sup>. Pathogen contamination and microbiota diversification were  
81 evaluated in mouse fecal contents every 2 weeks in sentinels by PCR for *Helicobacter bilis*, *H.*  
82 *ganmani*, *H. hepaticus*, *H. mastomyrinus*, *H. rodentium*, *Helicobacter spp.*, *H. typhlonius*,  
83 and *Pneumocystis murina*. Mouse serum was also tested for murine viral pathogens by  
84 multiplexed fluorometric immunoassay/enzyme-linked immunosorbent assay (ELISA)/indirect  
85 fluorescent antibody tests <sup>21</sup>. SPF colonization was performed by co-habitation of GF mice with  
86 SPF mice for a minimum of 1 month. In some experiments, mice were fed an elemental diet  
87 based on amino acids (TD1084 and TD 130916; Harlan Laboratories Inc.) for 3 generations prior  
88 to use. All procedures were approved by the McMaster University Animal Research Ethics  
89 Board.

90 **Intestinal cell isolation.** As previously described <sup>22,23</sup>, after flushing intestinal contents with cold  
91 PBS, fat was removed, and intestines were opened longitudinally and cut into approximately 3-5  
92 mm pieces. Mucus was eliminated by washing with phosphate-buffered saline (PBS) containing  
93 10 mM HEPES and 4  $\mu$ M dithiothreitol (DTT) (Sigma) for 15 min at 37°C while on a shaker.  
94 Epithelial cells were removed by 3 rounds of 10 min-washes at 37°C, under shaking, in PBS  
95 containing 10% fetal bovine serum (FBS), 10 mM HEPES and 5 mM ethylenediaminetetraacetic  
96 acid (EDTA). The tissues were then digested in 0.125 U/mL Collagenase A (Roche) with 130  
97 U/mL DNase I (Roche) in 10% FBS containing RPMI for 50–60 min in a shaker at 37°C. Lastly,  
98 the digested tissues were pressed through a 40  $\mu$ m nylon strainer (Falcon) and immune cells were  
99 purified via 40/70% Percoll (GE Healthcare) gradient and centrifugation.

100 **Tissue processing and cell isolation.** Bone marrow <sup>6</sup>, spleens <sup>24</sup>, uterus <sup>25</sup>, vaginal tract <sup>25</sup>, and  
101 blood <sup>6</sup> were collected and processed as previously described.

102 **EPO assay.** Intestinal tissue was made up to 100 mg/mL, w/v suspension, in PBS containing  
103 complete protease inhibitors (Roche) and rotor-stator homogenized (Polytron; Kinematica,  
104 Lucerne, Switzerland). The intestinal homogenate was centrifuged (1952 g x 10 min, 4°C) and  
105 red blood cells were lysed in the pellet via ACK lysis buffer. The pellet was resuspended in 2 mL  
106 of 0.2 % NaCl for 30 sec followed by 2 mL of 1.6% NaCl before centrifugation and resuspension  
107 at 100 mg/mL in Hank's balanced salt solution (HBSS) containing 0.5%  
108 hexadecyltrimethylammonium bromide (HTAB) (Sigma: H5882). Pellets were homogenized and  
109 freeze/thawed 3 times using liquid nitrogen. Finally, samples were centrifugated, the  
110 supernatants were transferred to clean tubes and EPO activity was measured as previously  
111 described <sup>26</sup>.

112 **Quantitative real-time PCR for gene validation.** Intestinal tissue was homogenized, and RNA  
113 was extracted using the RNeasy Kit (Qiagen). RNA was quantified and normalized, and RNA  
114 integrity was assessed by Agilent Bioanalyzer (Agilent Scientific). cDNA was generated using  
115 the SuperScript III Reverse Transcriptase kit (Life Technologies, Carlsbad, CA), according to the  
116 manufacturer's instructions. Relative transcript expression assay was conducted, as described

117 previously <sup>27</sup>, using the Fluidigm Biomark system (Fluidigm, San Francisco, CA). BestKeeper  
118 (version 1) <sup>28</sup> was used to identify the stably expressed housekeeping gene to be used as an  
119 internal reference. Among the four housekeeping genes [ $\beta$ -actin (Actb),  $\beta$ -2-microglobulin  
120 ( $\beta$ 2m), Gapdh and hypoxanthine phosphoribosyltransferase1 (Hprt1)], Hprt1 emerged as the  
121 most stably expressed and, thus, was selected for normalizing genes of interest. To visualize  
122 broad differences in the chemokine and cytokine signals, raw  $\Delta\Delta$ CT values were converted to a  
123 log scale. The fold change in gene expression between GF and SPF mice was represented on a  
124 heatmap with R software using the heatmap package. Data analysis of cycle threshold values was  
125 conducted using the Relative Expression Software Tool-384 (REST-384) version 1.

126 **Flow cytometry.** Antibodies were obtained from eBioscience, BD Biosciences, or BioLegend.  
127 In all assays, cells were incubated with anti-Fc $\gamma$ RII/III before incubation with fluorochrome-  
128 conjugated antibodies. Dead cells were excluded by propidium iodide uptake (Sigma) or fixable  
129 viability dye eFluor780 (eBioscience) and gated on singlets. On average, a minimum of 300,000  
130 alive and singlet cells were analyzed. Fluorescence minus one (FMO) and isotype controls were  
131 used for gating. Data were acquired on an LSR II or Fortessa (BD) and analyzed using FlowJo  
132 (Treestar). Flow-sorting experiments were performed on a FACS ARIA III (BD).

133 **Food allergy model.** Peanut butter (3.75 mg; ~1 mg of protein; Kraft, Northfield, IL) with 10  $\mu$ g  
134 of cholera toxin (List Biologicals, Campbell, CA) in 0.5 mL of PBS was administered  
135 intragastrically (Delvo SA, Biel, Switzerland) weekly for 4 weeks. Serum was collected by retro-  
136 orbital bleeding and analyzed for peanut-specific Igs via sandwich ELISA <sup>29-31</sup>.

137 **Histology and imaging systems.** Intestinal segments were collected and fixed in 10% formalin  
138 for 24 h, and then washed with 70% ethanol and paraffin embedded. Sections were stained with  
139 the Protocol Hema 3 stain set (Fisher Scientific, Hampton, NH) and Masson's Trichrome method  
140 <sup>32,33</sup>. For image analysis of histological sections, Masson's trichrome stained tissue slides were  
141 scanned (VS120-ASW v2.9 slide scanner, with UPlanSApo 20x objective, Olympus) and  
142 analyzed using HALO® Image Analysis Platform (v2.2.1870.34, Indica Labs Inc, Corrales, New  
143 Mexico) using Area Quantification module (v1.0).

144 **Statistics.** Data were analyzed and graphed with GraphPad Prism 7 software (GraphPad  
145 Software). Continuous data are expressed as means  $\pm$  SEMs and were analyzed by using 1-way  
146 ANOVA with Bonferroni *post hoc* tests and unpaired Student's *t* test. Differences were  
147 considered statistically significant at a *P* value of less than 0.05 or as indicated.

148

## 149 **RESULTS**

### 150 **The microbiota regulates the frequency of intestinal eosinophils**

151 In order to quantify eosinophil frequency, LP cells from the SI were isolated and  
152 evaluated by flow cytometry <sup>6</sup>. In agreement with previous reports <sup>6,34</sup>, intestinal eosinophils  
153 were identified as CD45<sup>+</sup> SSC<sup>high</sup> Siglec-F<sup>+</sup> cells and expressed high levels of CD11b (**Fig. 1A**).  
154 This putative population of eosinophils was flow-sorted and stained using Hema 3 to validate  
155 their identity. The microscopic analysis showed hallmark morphological features (*i.e.* lobular

156 polymorphic nucleus and eosinophilic granular cytoplasm) of eosinophils<sup>1,2</sup> in >95% of the cells  
157 (**Fig. 1B**).

158 Next, we compared eosinophil frequency in the SI of SPF and GF mice. To account for  
159 possible differences in strains biased towards Th1 and Th2 immunity<sup>35</sup>, both C57BL/6 and  
160 BALB/c strains were assessed. The frequency of intestinal eosinophils in GF mice was ~2-fold  
161 higher than in SPF controls, regardless of the strain (**Fig. 1C**). We then assessed the distribution  
162 of eosinophils along the SI tract of GF and SPF mice. Regardless of colonization status,  
163 eosinophils were enriched predominantly in the proximal end of the SI (duodenum) and reduced  
164 in the distal end (ileum) (**Fig. 1D**). Nevertheless, within all sections of the SI, GF mice harbored  
165 a greater proportion of eosinophils than SPF control mice. These data demonstrate that the  
166 microbiota significantly influences the basal tissue eosinophilia of the SI LP.

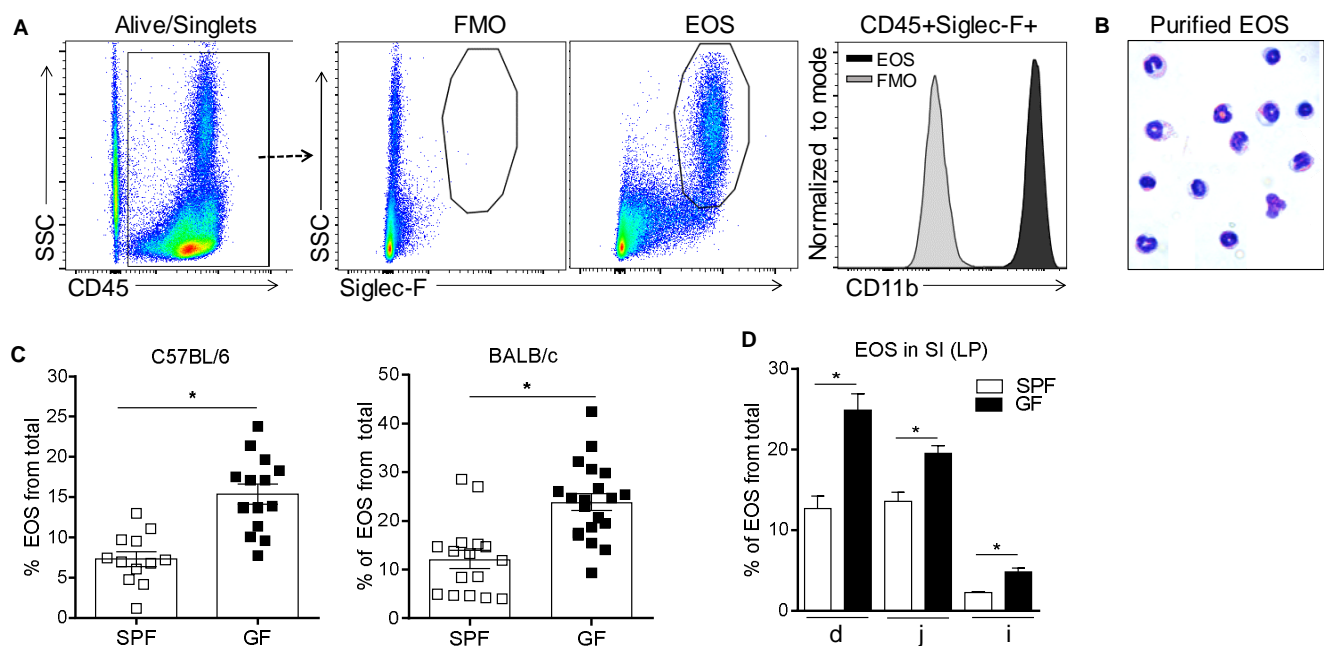

167  
168 **Figure 1.** Flow cytometric identification of small intestinal eosinophils (EOS) as alive  
169 singlet CD45+Siglec-F+ cells (A), morphologic validation (B) and assessment of their frequency  
170 in the small intestine (SI) of SPF and GF C57BL/6 and BALB/c mice (C, D). The frequency of  
171 EOS from total cells in the lamina propria (LP) of different sections of the SI including  
172 duodenum (d), jejunum (j) and ileum (i) of C57BL/6 mice (D). Pooled data from 3-4  
173 experiments (n=12-20) (C) or representative data from 3 experiments (D) represented as mean  $\pm$   
174 SEM, \*P<0.05

175  
176 **The microbiota sets the basal eosinophilic tone in naturally colonized mucosal**  
177 **surfaces**

178 To test whether the differences in eosinophils between GF and SPF mice were directly  
179 related to the microbiota, we colonized GF mice with either a complex (SPF) or simple (ASF)  
180 microflora<sup>21</sup>. To this end, we co-housed separate groups of GF mice with either ASF or SPF  
181 mice. The data show that the hypereosinophilia seen in the SI of GF mice was partially

182 attenuated by colonization with a minimal assortment of only 8 well-defined bacterial species<sup>21</sup>  
183 using ASF mice. Hypereosinophilia was fully attenuated with complex colonization using SPF  
184 flora (**Fig. 2A**). These data show a graded regulatory relationship between the complexity of the  
185 microbiota and tissue eosinophil levels.

186 Since the microbiota regulated the frequency of enteric eosinophils, we next examined  
187 whether germ-free induced hypereosinophilia was present in other naturally colonized mucosal  
188 sites (large intestine and vaginal tract), sterile —or poorly colonized— mucosal sites (uterus)<sup>36</sup>  
189 and non-mucosal sites (spleen). The frequency of eosinophils was also significantly higher in the  
190 large intestine and vaginal tract of GF mice compared to SPF (**Fig. 2B, C**) but not in sterile  
191 tissues such as the spleen (**Fig. 2D**) and uterus (**Fig. 2E**). These data further suggest that the  
192 frequency of tissue eosinophils is dependent on the natural colonization status.

193

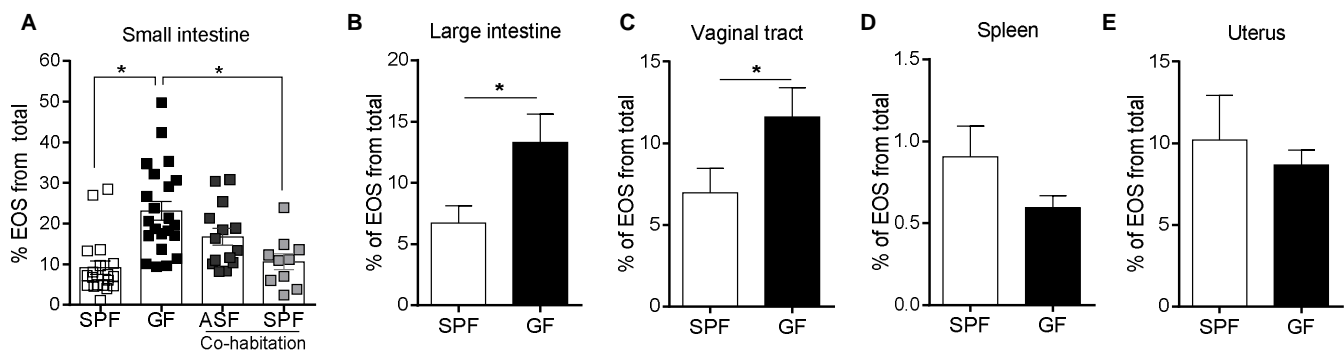

194

195 **Figure 2.** Separate groups of GF mice were colonized by co-habitation with ASF or SPF mice  
196 and the presence of small intestinal eosinophils (EOS) was assessed (A). Assessment of EOS  
197 frequency in the large intestine, vaginal tract, spleen and uterus of SPF and GF mice by flow  
198 cytometry (B-E). Pooled data from 2-5 experiments (n=8-22) represented as mean  $\pm$  SEM,  
199 \*P<0.05.

200

### 201 **The maturity of the immune system is not associated with intestinal hypereosinophilia**

202 It is well established that the adaptive immune system of GF mice is immature,  
203 particularly as it refers to T cells<sup>37</sup>. Consistent with previous observations<sup>38,39</sup>, we found that the  
204 frequency of CD4<sup>+</sup> T cells was significantly lower in the SI of GF mice compared to SPF  
205 controls (**Fig. 3A**). In contrast, there were no statistically significant differences in the frequency  
206 of B cells, dendritic cells (DCs), macrophages or mast cells (**Fig. 3A**). To investigate whether the  
207 hypereosinophilia observed in GF conditions was due to the absence of colonization or inherent  
208 to an immature immune system, we generated microbiota-competent mice with an immature  
209 immune system<sup>40</sup>. To this end, BALB/c mice, fed with an elemental (amino acid) diet and  
210 housed in a SPF environment, were bred for 3 generations. Fewer Peyer's patches and a lower  
211 frequency of CD4<sup>+</sup> T cells were recapitulated in the LP, confirming the immaturity of the  
212 adaptive immune system of these mice (**Fig. 3B**). We did not find changes in the frequency of B  
213 cells, macrophages or eosinophils. These findings indicate that the relative hypereosinophilia in

214 GF mice is likely due to a lack of microbial-derived signals rather than immune immaturity *per*  
 215 *se*.  
 216

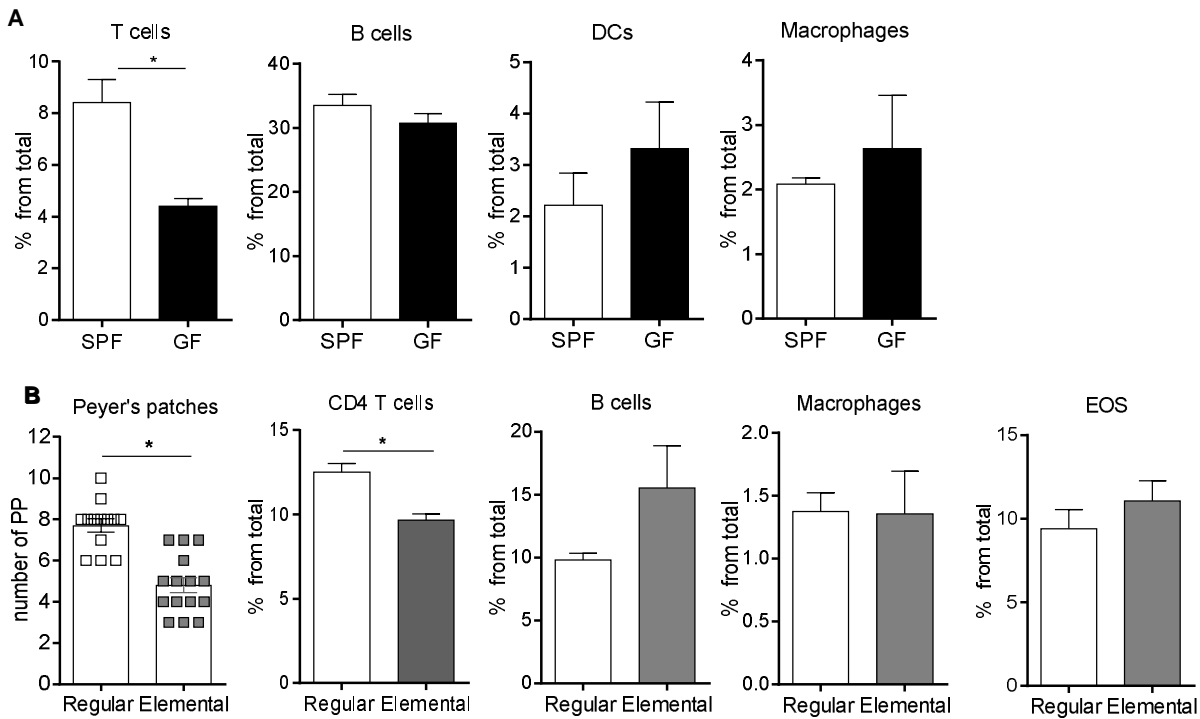

217  
 218 **Figure 3.** Flow cytometric characterization of adaptive and innate immune compartments (A, B)  
 219 in the small intestine of GF and SPF mice fed a regular (A) or elemental (B) diet (B). Pooled data  
 220 from 2-4 experiments (n=6-22) represented as mean  $\pm$  SEM, \*P<0.05.  
 221

### 222 The microbiota regulates eosinophil attraction and retention signals in mucosal tissues

223 Tissue accumulation of eosinophils associated with chronic intestinal inflammation is  
 224 typically attributed to increased eosinopoiesis<sup>41</sup>. Here, we investigated whether the same  
 225 mechanism applies to constitutive hypereosinophilia in healthy GF mice. We found that there  
 226 were no differences in BM eosinophils between GF and SPF mice, nor were differences in EOS  
 227 circulating in the peripheral blood (data not shown). This suggested that eosinophil accumulation  
 228 in mucosal sites of otherwise healthy GF mice might be mediated by increased expression of  
 229 attraction and/or retention signals in the SI, large intestine and vaginal tract.

230 To identify signals associated with eosinophil migration and retention at the tissue level,  
 231 we analyzed chemokine and cytokine RNA expression in the proximal (duodenum) and distal  
 232 (ileum) small intestinal segments of GF and SPF mice (**Fig. 4A**). The GF duodenum (GF D)  
 233 exhibited a significant increase in eosinophil-associated chemotactic genes such as CCL5  
 234 (RANTES), CCR5 and TSLP as compared to SPF controls (**Fig. 4B**). Furthermore, within the  
 235 GF ileum (GF I), we observed a significant increase in RANTES, CCR5, CCL24, CCL22 and  
 236 GM-CSF transcripts, which are associated with eosinophil recruitment and survival (**Fig. 4C**)<sup>42-</sup>

237 <sup>45</sup>. These data suggest that the microbiota downregulates signals involved in the attraction,  
 238 retention and survival of eosinophils in the SI, the absence of which results in the relative  
 239 hypereosinophilia found in GF conditions.  
 240

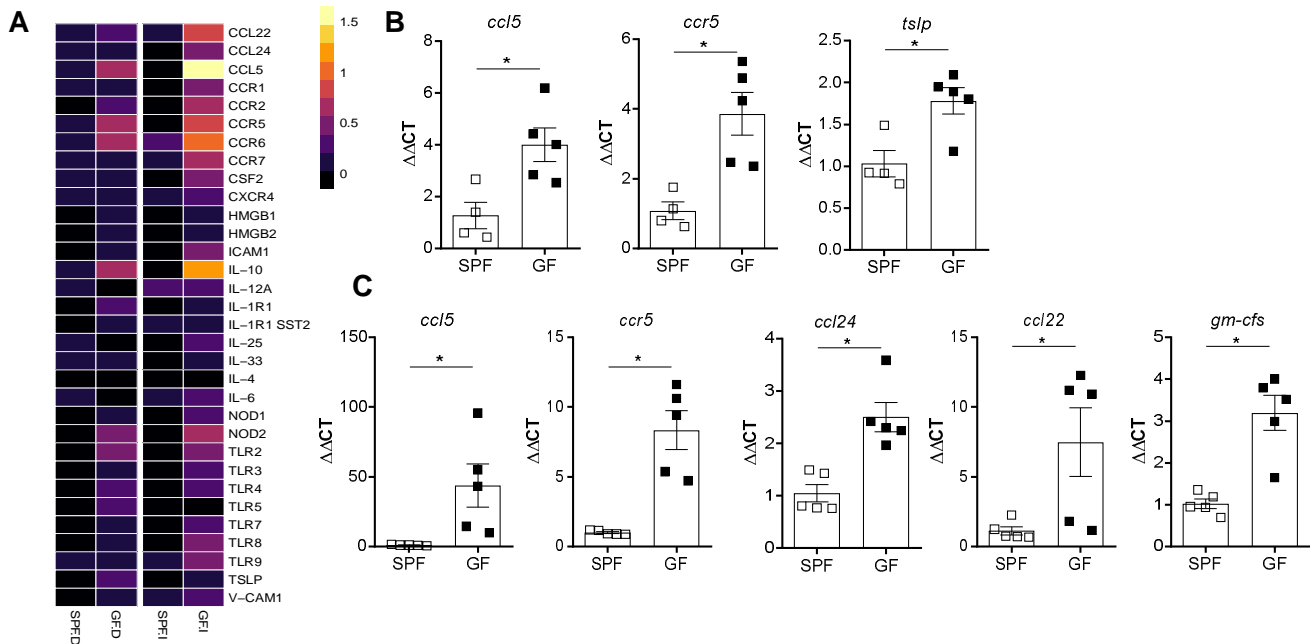

241 **Figure 4.** Heatmap of chemokine and cytokine RNA expression in the proximal  
 242 (duodenum; D) and distal (ileum; I) small intestinal segments from GF and SPF mice as  
 243 determined by quantitative, real time PCR (A). Genes differentially expressed in the proximal  
 244 (B) and distal (C) small intestine of SPF and GF mice. Data from 4-5 mice (B,C) represented as  
 245 mean  $\pm$  SEM, \*P<0.05.  
 246

## 247 **The microbiota modulates eosinophils-mediated intestinal remodeling and allergic** 248 **sensitization**

249 In order to evaluate GF eosinophil function, we first determined the degranulation status  
 250 of eosinophils by quantifying EPO activity <sup>26,46</sup> in SI homogenates of GF and SPF mice. Despite  
 251 the extensive hypereosinophilia (**Fig. 1C**), significantly lower EPO activity was detected in GF  
 252 mice (**Fig. 5A**) compared to SPF controls, thus suggesting ongoing eosinophil degranulation in  
 253 GF mice.

254 To investigate the functional significance of EPO degranulation in GF mice, we  
 255 generated a novel eosinophil-deficient mouse strain ( $\Delta$ dblGATA; GF-GATA) on a GF  
 256 background. Given that eosinophils are known to contribute to tissue remodeling, intestinal  
 257 tissues were assessed with Masson's Trichome staining <sup>32,33</sup> to evaluate collagen deposition (**Fig.**  
 258 **5B**). To remove potential bias of field selection, these differences were quantified using the  
 259 HALO Image Analysis software. This analysis demonstrated higher collagen density in the  
 260 submucosal layers of eosinophil-deficient mice, particularly in GF conditions, as compared to



261 SPF controls (**Fig. 5C**). These findings suggest that the absence of eosinophils in GF GATA  
 262 mice is associated with increased fibrotic tissue remodelling.

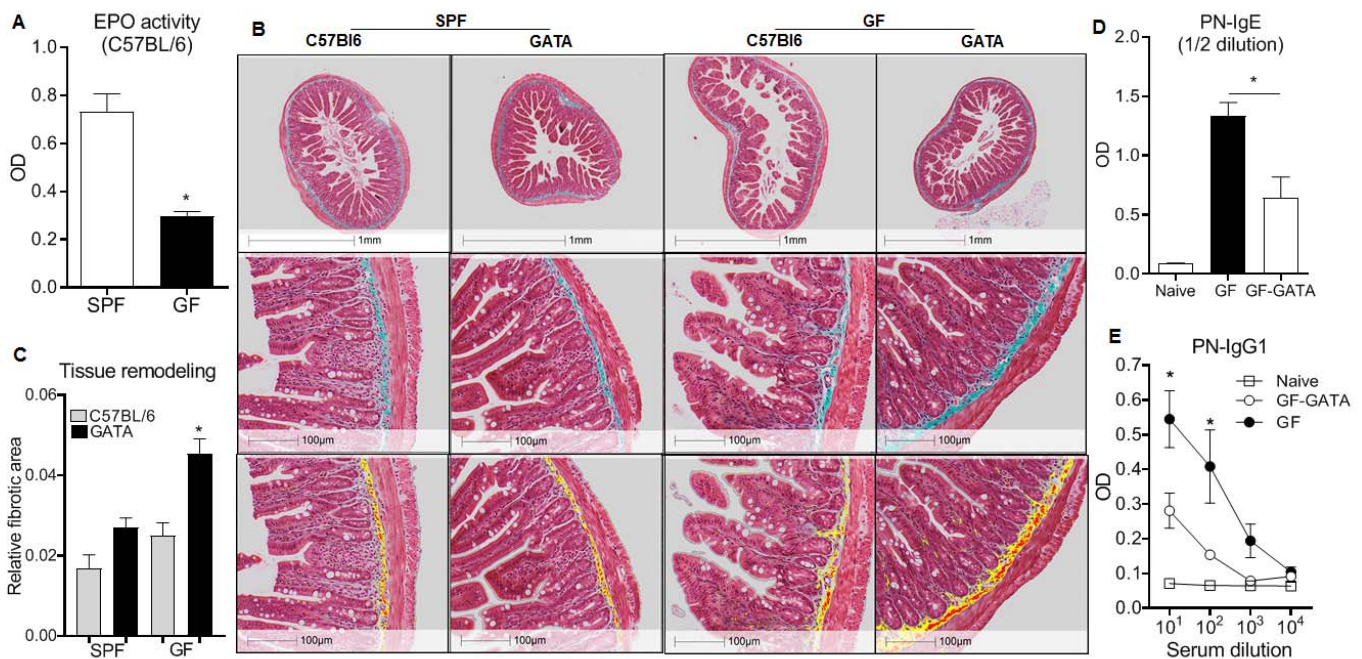

263  
 264 **Figure 5.** Assessment of eosinophil peroxidase activity (EPO) in intestinal homogenates  
 265 of SPF and GF mice (A). Representative histological examples of intestinal fibrosis (B, upper  
 266 panels) and associated Halo quantification of fibrotic surface on digitalized (20X) sections where  
 267 yellow and red represents Masson's Trichrome positive stain (B, lower panels) and associated  
 268 quantification (C) of overall fibrotic area performed on GF mice, eosinophil deficient GF mice  
 269 (GATA-GF) and controls. GF mice, eosinophil deficient GF mice (GATA-GF) and controls were  
 270 intragastrically sensitized to peanut (PN) and serum levels of PN-specific IgE (D) and IgG1 (E)  
 271 were determined by ELISA. Pooled data from 2 experiments (n=6) (A, D, E) or data from 4-5  
 272 mice (B,C) represented as mean  $\pm$  SEM, \*P<0.05.

273  
 274 Intestinal eosinophils play a critical role in the initiation of allergic responses to food  
 275 allergens. We have previously demonstrated that eosinophil-deficient ( $\Delta$ dblGATA) mice are  
 276 unable to produce peanut-specific immunoglobulins<sup>6</sup>. Additionally, gut dysbiosis has been  
 277 associated with a higher risk of developing allergy in humans<sup>47-50</sup>, and GF mice have been  
 278 shown to be prone to generate Th2 responses<sup>51,52</sup>. In this context, we evaluated if the lack of  
 279 microbial modulation of eosinophils may impact allergic sensitization to foods. We employed an  
 280 established food allergy model using intragastric sensitization to peanut<sup>22,30,53,54</sup> in GF mice on a  
 281 GATA or C57BL/6 backgrounds. Compared to naïve mice, both strains of GF mice develop  
 282 peanut-specific IgE (**Fig. 5D**) and IgG1 (**Fig. 5E**) were elevated in both strains of GF mice.  
 283 However, the production of both immunoglobulins was significantly lower in eosinophil-  
 284 deficient mice. These findings raise the possibility that the microbiota influences the  
 285 development of food allergic sensitization partly through its effects on intestinal eosinophils.

286

287

## 288 **DISCUSSION**

289 Mucosal eosinophils have been traditionally considered recruited proinflammatory cells,  
290 whose biological benefit is limited to defence against parasitic infections. However, new  
291 evidence has established that eosinophils also contribute the initiation, propagation, and  
292 resolution of innate and adaptive immune responses, and to homeostatic tissue repair and  
293 remodeling<sup>4,5,55,56</sup>. The diversity of functions ascribed to enteric eosinophils in particular has  
294 prompted the investigation of the mechanisms that influence their tissue residence and  
295 functionality. In this context, microbiota is known to be critical for the development of the SI  
296 mucosal adaptive immune system<sup>16</sup>; given that eosinophils natively inhabit the SI<sup>57</sup>, we  
297 investigated the impact of the microbiota on intestinal eosinophil frequency and function.

298 Quantification of intestinal eosinophils was carried out by flow cytometry<sup>6,34</sup> and further  
299 validated by morphological analysis (**Fig. 1A-B**). The total frequency of intestinal eosinophils in  
300 either C57BL/6 or BALB/c was ~2 fold higher in GF mice as compared to SPF controls (**Fig.**  
301 **1C**). This is in contrast with the findings by Mishra *et al.*<sup>44</sup>, who did not observe significant  
302 differences in eosinophils numbers in the GI of SPF and GF mice when quantified by histology.  
303 Several factors might have contributed to this discrepancy including the strain of mice (Black  
304 Swiss mice *vs* C57BL/6 and BALB/c), microbiome differences under SPF conditions, the  
305 number of mice utilized in each study (n=5 *vs* n=12-20) and, lastly, the technique employed for  
306 eosinophils quantification, as it is likely that flow cytometry allowed for a more comprehensive  
307 and precise quantification than immunohistochemistry using the eosinophil granule protein,  
308 major basic protein (MBP)<sup>58</sup>. Further, we show that intestinal eosinophils have a propensity for  
309 degranulation, which may lead to eosinophil underdetection when using MBP-based methods.

310 Consistent with previous reports<sup>6,44</sup>, eosinophils were pre-eminently localized in the  
311 proximal end of the SI and decreased in frequency distally. However, the proportion of  
312 eosinophils in each section was significantly higher in GF mice compared to SPF controls (**Fig.**  
313 **1D**). Importantly, colonization of GF mice with a complex microbiota reduced enteric  
314 eosinophils to a frequency comparable to SPF mice. This shows that enteric eosinophilia is  
315 greatly influenced by the host intestinal microbiome (**Fig. 1E**).

316 We next considered whether enteric hypereosinophilia could be an innate response to  
317 compensate for the immaturity of the adaptive immune system that occurs in GF mice. It is  
318 known that feeding SPF mice with an elemental diet results in an immature immune system<sup>59</sup>.  
319 Our data show that the administration of an elemental diet for 3 generations resulted in features  
320 indicative of immune immaturity, such as a reduced number of Peyer's patches and lower CD4<sup>+</sup>  
321 T lymphocytes. However, it did not lead to the hypereosinophilia identified in GF mice fed with  
322 a conventional diet (**Fig. 2**), which suggests that enteric eosinophilia is independent of the  
323 maturity of the adaptive immune system and thus dependent on the microbiota.

324 The relative hypereosinophilia observed in GF mice, its regulation by complex microbial  
325 colonization and its independence of the maturity of the adaptive immune system, along with the

326 findings of unperturbed eosinopoiesis suggest that the microbiota directly regulates enteric  
327 eosinophils through interactions with cells resident in the mucosal compartment. The increased  
328 expression of signals involved in the attraction, retention and activation of eosinophils such as  
329 RANTES, CCR5, CCL24, GM-CSF and TLSP<sup>42-45</sup> in the SI of GF mice compared to SPF  
330 supports this notion (**Fig. 4**).

331 A hallmark feature of eosinophils activation is the release of granular contents such as  
332 MBP or EPO<sup>56</sup>. We detected a significant reduction of EPO activity in enteric eosinophils from  
333 GF mice, as compared to SPF controls, which is indicative of degranulation (**Fig. 5A**). While  
334 eosinophils degranulation is often associated with tissue damage, eosinophil-derived granule  
335 proteins can also participate in tissue homeostasis<sup>60</sup>. For example, eosinophil-derived neurotoxin  
336 and EPO promote fibroblast proliferation and collagen biosynthesis respectively<sup>61,62</sup>. However,  
337 the effect may be dependent on tissue location as *ex vivo* experiments with eosinophil lysates  
338 induced opposite effects in terms of collagen production in dermal and lung fibroblasts<sup>63</sup>. In the  
339 gut, increased eosinophil activation has been detected in patients with ulcerative colitis (UC), as  
340 compared to controls. Interestingly, the number activated eosinophils was larger during the  
341 remission phase of UC<sup>64</sup>, which may evince a dual role in intestinal inflammation and repair.  
342 We found that in mice lacking both eosinophils and microbiota, collagen deposition in the  
343 submucosal layer was double that of mice deficient in either eosinophils or microbiota alone  
344 (**Fig. 5B & C**), suggesting that at least certain components of tissue remodeling are regulated by  
345 interactions between the microbiota and eosinophils.

346 Several lines of evidence have indicated that dysbiosis in humans is associated with an  
347 increased prevalence of allergic sensitization<sup>47,65-67</sup>. However, the mechanisms underlying this  
348 association remain to be fully elucidated. It was recently shown that GF and antibiotic-treated  
349 mice developed increased allergic sensitization as compared to SPF mice<sup>52</sup>. On the other hand,  
350 we have shown that enteric eosinophils are essential to the induction of allergic sensitization in  
351 SPF mice<sup>6</sup>. These observations raise the question of whether the microbiota and enteric  
352 eosinophils synergize in the induction of allergic sensitization. Here, having demonstrated that  
353 GF mice exhibit hypereosinophilia, we show that the absence of eosinophils in GF mice results  
354 in an attenuation of allergic sensitization. Thus, these data support the concept that the  
355 microbiota influences the capacity to develop allergic sensitization, at least in part, through its  
356 effects on enteric eosinophils.

357 In summary, this study demonstrates that eosinophil frequency and activation in the  
358 intestinal mucosa is regulated by the microbiota. It also shows that processes such as tissue repair  
359 and the induction of allergic sensitization appear to be regulated by an interplay between the  
360 commensal microbiota and intestinal eosinophils. Given that the tissue microenvironment  
361 crucially shapes the nature and evolution of subsequent antigen-host interactions, these data have  
362 fundamental implications to understanding the role of the microbiota and eosinophils in health  
363 and disease.

364

365 **AUTHOR CONTRIBUTIONS**

366 RJS conceptualized the project and designed experiments. RJS and VA performed experiments,  
367 analyzed the data and wrote the manuscript. TW, MEG, TSM, RC, JFK and YE, helped with  
368 experiments. HJG conducted experiments in the Axenic and Gnotobiotic Unit. EFV generated  
369 GATA-GF mice. SA and KA performed HALO analysis. AH performed genetic analyses. EFV,  
370 KA and DKC provided scientific input and revised the manuscript. MJ obtained funding,  
371 oversaw the project and edited the manuscript.

372

### 373 **FUNDING**

374 This work was supported by Food Allergy Canada, the Delaney family, the Zych family, the  
375 Walter and Maria Schroeder Foundation and AllerGen NCE.

376

### 377 **ACKNOWLEDGMENTS**

378 We acknowledge Dr. Puja Bagri for critical review of the manuscript. We thank all the members  
379 of the Jordana Lab for technical help and scientific input.

380

### 381 **REFERENCES**

- 382 1 Lee, J. J., Jacobsen, E. A., McGarry, M. P., Schleimer, R. P. & Lee, N. A. Eosinophils in  
383 health and disease: the LIAR hypothesis. *Clin Exp Allergy* **40**, 563-575,  
384 doi:10.1111/j.1365-2222.2010.03484.x (2010).
- 385 2 Rosenberg, H. F., Dyer, K. D. & Foster, P. S. Eosinophils: changing perspectives in  
386 health and disease. *Nat Rev Immunol* **13**, 9-22, doi:10.1038/nri3341  
387 nri3341 [pii] (2013).
- 388 3 Arnold, I. C. *et al.* Eosinophils suppress Th1 responses and restrict bacterially induced  
389 gastrointestinal inflammation. *J Exp Med*, doi:10.1084/jem.20172049 (2018).
- 390 4 Abdala-Valencia, H. *et al.* Shaping eosinophil identity in the tissue contexts of  
391 development, homeostasis, and disease. *J Leukoc Biol* **104**, 95-108,  
392 doi:10.1002/JLB.1MR1117-442RR (2018).
- 393 5 Xenakis, J. J. *et al.* Resident intestinal eosinophils constitutively express antigen  
394 presentation markers and include two phenotypically distinct subsets of eosinophils.  
395 *Immunology* **154**, 298-308, doi:doi:10.1111/imm.12885 (2018).
- 396 6 Chu, D. K. *et al.* Indigenous enteric eosinophils control DCs to initiate a primary Th2  
397 immune response in vivo. *J Exp Med* **211**, 1657-1672, doi:10.1084/jem.20131800 (2014).
- 398 7 Cañas, J. A. *et al.* Eosinophil-derived exosomes contribute to asthma remodelling by  
399 activating structural lung cells. *Clinical & Experimental Allergy* **48**, 1173-1185,  
400 doi:doi:10.1111/cea.13122 (2018).
- 401 8 Takemura, N. *et al.* Eosinophil depletion suppresses radiation-induced small intestinal  
402 fibrosis. *Sci Transl Med* **10**, doi:10.1126/scitranslmed.aan0333 (2018).
- 403 9 Bordon, Y. Mucosal immunology: Eosinophils get the party started. *Nat Rev Immunol* **14**,  
404 580-581, doi:10.1038/nri3731 (2014).
- 405 10 Yang, B. G., Seoh, J. Y. & Jang, M. H. Regulatory Eosinophils in Inflammation and  
406 Metabolic Disorders. *Immune Netw* **17**, 41-47, doi:10.4110/in.2017.17.1.41 (2017).
- 407 11 Sugawara, R. *et al.* Small intestinal eosinophils regulate Th17 cells by producing IL-1  
408 receptor antagonist. *J Exp Med* **213**, 555-567, doi:10.1084/jem.20141388 (2016).

- 409 12 Matsumoto, K., Fukuda, S., Nakamura, Y. & Saito, H. Amphiregulin production by  
410 human eosinophils. *Int Arch Allergy Immunol* **149 Suppl 1**, 39-44,  
411 doi:10.1159/000210652 (2009).
- 412 13 Wen, T. & Rothenberg, M. E. The Regulatory Function of Eosinophils. *Microbiol Spectr*  
413 **4**, doi:10.1128/microbiolspec.MCHD-0020-2015 (2016).
- 414 14 Shi, N., Li, N., Duan, X. & Niu, H. Interaction between the gut microbiome and mucosal  
415 immune system. *Mil Med Res* **4**, 14, doi:10.1186/s40779-017-0122-9 (2017).
- 416 15 McDermott, A. J. & Huffnagle, G. B. The microbiome and regulation of mucosal  
417 immunity. *Immunology* **142**, 24-31, doi:10.1111/imm.12231 (2014).
- 418 16 Smith, K., McCoy, K. D. & Macpherson, A. J. Use of axenic animals in studying the  
419 adaptation of mammals to their commensal intestinal microbiota. *Semin. Immunol.* **19**,  
420 59-69, doi:10.1016/j.smim.2006.10.002 (2007).
- 421 17 Crabbe, P. A., Bazin, H., Eyssen, H. & Heremans, J. F. The normal microbial flora as a  
422 major stimulus for proliferation of plasma cells synthesizing IgA in the gut. The germ-  
423 free intestinal tract. *Int Arch Allergy Appl Immunol* **34**, 362-375 (1968).
- 424 18 Bandeira, A. *et al.* Localization of gamma/delta T cells to the intestinal epithelium is  
425 independent of normal microbial colonization. *J Exp Med* **172**, 239-244 (1990).
- 426 19 Rosenberg, H. F., Masterson, J. C. & Furuta, G. T. Eosinophils, probiotics, and the  
427 microbiome. *J Leukoc Biol* **100**, 881-888, doi:10.1189/jlb.3RI0416-202R (2016).
- 428 20 Slack, E. *et al.* Innate and adaptive immunity cooperate flexibly to maintain host-  
429 microbiota mutualism. *Science* **325**, 617-620, doi:10.1126/science.1172747 (2009).
- 430 21 Galipeau, H. J. *et al.* Intestinal microbiota modulates gluten-induced immunopathology in  
431 humanized mice. *Am J Pathol* **185**, 2969-2982, doi:10.1016/j.ajpath.2015.07.018 (2015).
- 432 22 Jimenez-Saiz, R. *et al.* Lifelong memory responses perpetuate humoral TH2 immunity  
433 and anaphylaxis in food allergy. *J Allergy Clin Immunol* **140**, 1604-1615 e1605,  
434 doi:10.1016/j.jaci.2017.01.018 (2017).
- 435 23 Carlens, J. *et al.* Common gamma-chain-dependent signals confer selective survival of  
436 eosinophils in the murine small intestine. *J Immunol* **183**, 5600-5607,  
437 doi:10.4049/jimmunol.0801581 (2009).
- 438 24 Jimenez-Saiz, R., Rupa, P. & Mine, Y. Immunomodulatory effects of heated ovomucoid-  
439 depleted egg white in a BALB/c mouse model of egg allergy. *J Agric Food Chem* **59**,  
440 13195-13202, doi:10.1021/jf202963r (2011).
- 441 25 Anipindi, V. C. *et al.* Estradiol Enhances CD4+ T-Cell Anti-Viral Immunity by Priming  
442 Vaginal DCs to Induce Th17 Responses via an IL-1-Dependent Pathway. *PLoS Pathog*  
443 **12**, e1005589, doi:10.1371/journal.ppat.1005589 (2016).
- 444 26 Humbles, A. A. *et al.* Kinetics of eotaxin generation and its relationship to eosinophil  
445 accumulation in allergic airways disease: analysis in a guinea pig model in vivo. *J Exp*  
446 *Med* **186**, 601-612 (1997).
- 447 27 Al-Garawi, A. *et al.* Shifting of immune responsiveness to house dust mite by influenza  
448 A infection: genomic insights. *J Immunol* **188**, 832-843, doi:10.4049/jimmunol.1102349  
449 (2012).
- 450 28 Pfaffl, M. W., Tichopad, A., Prgomet, C. & Neuvians, T. P. Determination of stable  
451 housekeeping genes, differentially regulated target genes and sample integrity:  
452 BestKeeper – Excel-based tool using pair-wise correlations. *Biotechnology Letters* **26**,  
453 509-515, doi:10.1023/b:Bile.0000019559.84305.47 (2004).

- 454 29 Swirski, F. K. *et al.* Chronic exposure to innocuous antigen in sensitized mice leads to  
455 suppressed airway eosinophilia that is reversed by granulocyte macrophage colony-  
456 stimulating factor. *J Immunol* **169**, 3499-3506 (2002).
- 457 30 Chu, D. K. *et al.* T helper cell IL-4 drives intestinal Th2 priming to oral peanut antigen,  
458 under the control of OX40L and independent of innate-like lymphocytes. *Mucosal*  
459 *Immunol* **7**, 1395-1404, doi:10.1038/mi.2014.29 (2014).
- 460 31 Jimenez-Saiz, R. *et al.* IgG1(+) B-cell immunity predates IgE responses in epicutaneous  
461 sensitization to foods. *Allergy*, doi:10.1111/all.13481 (2018).
- 462 32 Goldner, J. A modification of the masson trichrome technique for routine laboratory  
463 purposes. *Am J Pathol* **14**, 237-243 (1938).
- 464 33 Fischer, A. H., Jacobson, K. A., Rose, J. & Zeller, R. Hematoxylin and eosin staining of  
465 tissue and cell sections. *CSH Protoc* **2008**, pdb prot4986, doi:10.1101/pdb.prot4986  
466 (2008).
- 467 34 Dyer, K. D., Garcia-Crespo, K. E., Killoran, K. E. & Rosenberg, H. F. Antigen profiles  
468 for the quantitative assessment of eosinophils in mouse tissues by flow cytometry. *J*  
469 *Immunol Methods* **369**, 91-97, doi:10.1016/j.jim.2011.04.009 (2011).
- 470 35 Sellers, R. S., Clifford, C. B., Treuting, P. M. & Brayton, C. Immunological variation  
471 between inbred laboratory mouse strains: points to consider in phenotyping genetically  
472 immunomodified mice. *Vet Pathol* **49**, 32-43, doi:10.1177/0300985811429314 (2012).
- 473 36 Perez-Muñoz, M. E., Arrieta, M.-C., Ramer-Tait, A. E. & Walter, J. A critical assessment  
474 of the “sterile womb” and “in utero colonization” hypotheses: implications for research  
475 on the pioneer infant microbiome. *Microbiome* **5**, 48, doi:10.1186/s40168-017-0268-4  
476 (2017).
- 477 37 Smith, K., McCoy, K. D. & Macpherson, A. J. Use of axenic animals in studying the  
478 adaptation of mammals to their commensal intestinal microbiota. *Semin Immunol* **19**, 59-  
479 69, doi:10.1016/j.smim.2006.10.002 (2007).
- 480 38 Macpherson, A. J. & Harris, N. L. Interactions between commensal intestinal bacteria  
481 and the immune system. *Nat Rev Immunol* **4**, 478-485, doi:10.1038/nri1373 (2004).
- 482 39 Round, J. L. & Mazmanian, S. K. The gut microbiota shapes intestinal immune responses  
483 during health and disease. *Nat Rev Immunol* **9**, 313-323, doi:10.1038/nri2515 (2009).
- 484 40 Faria, A. M. *et al.* Food components and the immune system: from tonic agents to  
485 allergens. *Front Immunol* **4**, 102, doi:10.3389/fimmu.2013.00102 (2013).
- 486 41 Griseri, T. *et al.* Granulocyte Macrophage Colony-Stimulating Factor-Activated  
487 Eosinophils Promote Interleukin-23 Driven Chronic Colitis. *Immunity* **43**, 187-199,  
488 doi:10.1016/j.immuni.2015.07.008 (2015).
- 489 42 Lee, J. J. *et al.* Human versus mouse eosinophils: “that which we call an eosinophil, by  
490 any other name would stain as red”. *J Allergy Clin Immunol* **130**, 572-584,  
491 doi:10.1016/j.jaci.2012.07.025 (2012).
- 492 43 Vancheri, C. *et al.* Human lung fibroblast-derived granulocyte-macrophage colony  
493 stimulating factor (GM-CSF) mediates eosinophil survival in vitro. *Am J Respir Cell Mol*  
494 *Biol* **1**, 289-295, doi:10.1165/ajrcmb/1.4.289 (1989).
- 495 44 Mishra, A., Hogan, S. P., Lee, J. J., Foster, P. S. & Rothenberg, M. E. Fundamental  
496 signals that regulate eosinophil homing to the gastrointestinal tract. *J Clin Invest* **103**,  
497 1719-1727, doi:10.1172/JCI6560 (1999).
- 498 45 Wong, C. K., Hu, S., Cheung, P. F. & Lam, C. W. Thymic stromal lymphopoietin  
499 induces chemotactic and prosurvival effects in eosinophils: implications in allergic

inflammation. *Am J Respir Cell Mol Biol* **43**, 305-315, doi:10.1165/rcmb.2009-0168OC (2010).

46 White, S. R., Kulp, G. V., Spaethe, S. M., Van Alstyne, E. & Leff, A. R. A kinetic assay for eosinophil peroxidase activity in eosinophils and eosinophil conditioned media. *J Immunol Methods* **144**, 257-263 (1991).

47 Plunkett, C. H. & Nagler, C. R. The Influence of the Microbiome on Allergic Sensitization to Food. *J Immunol* **198**, 581-589, doi:10.4049/jimmunol.1601266 (2017).

48 Pascal, M. *et al.* Microbiome and Allergic Diseases. *Front Immunol* **9**, doi:10.3389/fimmu.2018.01584 (2018).

49 Zimmermann, P., Messina, N., Mohn, W. W., Finlay, B. B. & Curtis, N. Association between the intestinal microbiota and allergic sensitization, eczema, and asthma: A systematic review. *Journal of Allergy and Clinical Immunology*, doi:10.1016/j.jaci.2018.09.025.

50 Feehley, T. *et al.* Healthy infants harbor intestinal bacteria that protect against food allergy. *Nat. Med.*, doi:10.1038/s41591-018-0324-z (2019).

51 McCoy, K. D., Ignacio, A. & Geuking, M. B. Microbiota and Type 2 immune responses. *Curr Opin Immunol* **54**, 20-27, doi:10.1016/j.coi.2018.05.009 (2018).

52 Stefka, A. T. *et al.* Commensal bacteria protect against food allergen sensitization. *Proc Natl Acad Sci U S A*, doi:10.1073/pnas.1412008111 (2014).

53 Arias, K. *et al.* Distinct immune effector pathways contribute to the full expression of peanut-induced anaphylactic reactions in mice. *J Allergy Clin Immunol* **127**, 1552-1561 e1551, doi:10.1016/j.jaci.2011.03.044 (2011).

54 Kong, J. *et al.* Comprehensive metabolomics identifies the alarmin uric acid as a critical signal for the induction of peanut allergy. *Allergy* **70**, 495-505, doi:10.1111/all.12579 (2015).

55 Travers, J. & Rothenberg, M. E. Eosinophils in mucosal immune responses. *Mucosal Immunol* **8**, 464-475, doi:10.1038/mi.2015.2 (2015).

56 Kita, H. Eosinophils: multifaceted biological properties and roles in health and disease. *Immunol Rev* **242**, 161-177, doi:10.1111/j.1600-065X.2011.01026.x (2011).

57 Mowat, A. M. & Bain, C. C. News & Highlights. *Mucosal Immunology* **3**, 420, doi:10.1038/mi.2010.24 (2010).

58 Szantho, E. *et al.* Comparative Analysis of Multicolor Flow Cytometry and Immunohistochemistry for the Detection of Disseminated Tumor Cells. *Appl Immunohistochem Mol Morphol* **26**, 305-315, doi:10.1097/PAI.0000000000000519 (2018).

59 Menezes, J. S. *et al.* Immunological activities are modulated by enteral administration of an elemental diet in mice. *Clin Nutr* **25**, 643-652, doi:10.1016/j.clnu.2006.01.005 (2006).

60 Shamri, R., Xenakis, J. J. & Spencer, L. A. Eosinophils in innate immunity: an evolving story. *Cell Tissue Res*. **343**, 57-83, doi:10.1007/s00441-010-1049-6 (2011).

61 Puxeddu, I., Ribatti, D., Crivellato, E. & Levi-Schaffer, F. Mast cells and eosinophils: a novel link between inflammation and angiogenesis in allergic diseases. *J Allergy Clin Immunol* **116**, 531-536, doi:10.1016/j.jaci.2005.06.007 (2005).

62 DeNichilo, M. O. *et al.* Peroxidase enzymes regulate collagen extracellular matrix biosynthesis. *Am J Pathol* **185**, 1372-1384, doi:10.1016/j.ajpath.2015.01.013 (2015).

63 Levi-Schaffer, F. *et al.* Human eosinophils regulate human lung- and skin-derived fibroblast properties *in vitro*: A role for transforming growth factor  $\beta$  (TGF-

546  $\beta$ ). *Proceedings of the National Academy of Sciences* **96**, 9660-9665,  
547 doi:10.1073/pnas.96.17.9660 (1999).  
548 64 Lampinen, M. *et al.* Eosinophil granulocytes are activated during the remission phase of  
549 ulcerative colitis. *Gut* **54**, 1714-1720, doi:10.1136/gut.2005.066423 (2005).  
550 65 Risnes, K. R., Belanger, K., Murk, W. & Bracken, M. B. Antibiotic exposure by 6  
551 months and asthma and allergy at 6 years: Findings in a cohort of 1,401 US children. *Am*  
552 *J Epidemiol* **173**, 310-318, doi:10.1093/aje/kwq400 (2011).  
553 66 Russell, S. L. *et al.* Early life antibiotic-driven changes in microbiota enhance  
554 susceptibility to allergic asthma. *EMBO Rep* **13**, 440-447, doi:10.1038/embor.2012.32  
555 (2012).  
556 67 Ellenbogen, Y. *et al.* The Initiation of Th2 Immunity Towards Food Allergens. *Int J Mol*  
557 *Sci* **19**, doi:10.3390/ijms19051447 (2018).  
558
